# Supplementary material for: Infections in Glucose-6-Phosphate Dehydrogenase G6PD-Deficient Patients; Predictors for Infection-Related Mortalities and Treatment Outcomes
Source: MDPI journal article supplement (doi:10.3390/antibiotics12030494), 2023-03-01
Supplement: s1 [file s1]

## Supplementary Materials:

**Table S1.** Patient's Demographics.

|                                   |                  | Overall<br>N (%) |  | Recovery<br>N (%) |  | Death<br>N (%) | P value<br>Chi |
|-----------------------------------|------------------|------------------|--|-------------------|--|----------------|----------------|
| Gender                            | Female           | 123 (32)         |  | 82 (29.9)         |  | 32 (30.5)      | 1.000          |
|                                   | Male             | 256 (68)         |  | 192 (70.1)        |  | 73 (69.5)      |                |
| Age                               | median (IQR)     | 60 (41-77)       |  | 53 (35-72)        |  | 77 (68-80)     | <0.001         |
|                                   | ≤ 60 Years       | 190 (50)         |  | 172 (62.8)        |  | 18 (17.1)      | <0.001         |
|                                   | > 60 years       | 189 (50)         |  | 102 (37.2)        |  | 87 (82.9)      |                |
| Length of stay                    | median (IQR)     | 12 (5-31)        |  | 9 (5-24)          |  | 26 (13-43)     | <0.001         |
|                                   | ≤ 14 days        | 195 (51)         |  | 168 (61.3)        |  | 27 (25.7)      | <0.001         |
|                                   | > 14 days        | 184 (49)         |  | 106 (38.7)        |  | 78 (74.3)      |                |
| Admission with infectious disease | No               | 105 (29)         |  | 91 (33.2)         |  | 15 (14.3)      |                |
|                                   | Yes              | 273 (72)         |  | 183 (66.8)        |  | 90 (85.7)      | <0.001         |
| Admission to critical care area   | No               | 262 (69)         |  | 217 (79.2)        |  | 45 (42.9)      | <0.001         |
|                                   | Yes              | 117 (31)         |  | 57 (20.8)         |  | 60 (57.1)      |                |
| Underlying Comorbidities          |                  |                  |  |                   |  |                |                |
| Diabetes                          | No               | 125 (33)         |  | 104 (38.0)        |  | 21 (20.0)      | 0.001          |
|                                   | Yes              | 254 (67)         |  | 170 (62.0)        |  | 84 (80.0)      |                |
| Chronic renal failure             | No               | 151 (40)         |  | 133 (48.5)        |  | 18 (17.1)      | <0.001         |
|                                   | Yes              | 228 (60)         |  | 141 (51.5)        |  | 87 (82.9)      |                |
| Active malignancy                 | No               | 365 (96)         |  | 267 (97.4)        |  | 98 (93.3)      | 0.111          |
|                                   | Yes              | 14 (4)           |  | 7 (2.6)           |  | 7 (6.7)        |                |
| Immunosuppressed                  | No               | 355 (94)         |  | 259 (94.5)        |  | 96 (91.4)      | 0.383          |
|                                   | Yes              | 24 (6)           |  | 15 (5.5)          |  | 9 (8.6)        |                |
| Chronic Cardiac Diseases          | No               | 97 (26)          |  | 89 (32.5)         |  | 8 (7.6)        | <0.001         |
|                                   | Yes              | 282 (74)         |  | 185 (67.5)        |  | 97 (92.4)      |                |
| HIV follow-up AIDS                | No               | 278 (100)        |  | 274 (100.0)       |  | 104 (99.0)     | 0.618          |
|                                   | Yes              | 1 (0)            |  | 0 (0.0)           |  | 1 (1.0)        |                |
| Chronic Resp. Disease             | No               | 309 (82)         |  | 247 (90.1)        |  | 62 (59.0)      | <0.001         |
|                                   | Yes              | 70 (18)          |  | 27 (9.9)          |  | 43 (41.0)      |                |
| Sickle Cell                       | No               | 359 (95)         |  | 256 (93.4)        |  | 104 (99.0)     | 0.048          |
|                                   | Yes              | 19 (5)           |  | 18 (6.6)          |  | 1 (1.0)        |                |
| Others                            | No               | 200 (53)         |  | 152 (55.5)        |  | 48 (45.7)      | 0.112          |
|                                   | Yes              | 179 (47)         |  | 122 (44.5)        |  | 57 (54.3)      |                |
| Comorbid conditions               | No. median (IQR) | 3 (2-4)          |  | 4 (3-4)           |  | 3 (2-4)        | <0.001         |
|                                   | No comorbidity   | 41 (11)          |  | 40 (14.6)         |  | 1 (1.0)        | <0.001         |

|                                     |                 |           |  |            |  |             |        |
|-------------------------------------|-----------------|-----------|--|------------|--|-------------|--------|
|                                     | Any comorbidity | 338 (89)  |  | 234 (85.4) |  | 104 (99.0)  |        |
| Risk Factors for infection          |                 |           |  |            |  |             |        |
| Blood transfusion during admission  | No              | 167 (44)  |  | 146 (53.3) |  | 21 (20.0)   | <0.001 |
|                                     | Yes             | 212 (56)  |  | 128 (46.7) |  | 84 (80.0)   |        |
| Invasive procedure during admission | No              | 94 (25)   |  | 92 (33.6)  |  | 2 (1.9)     | <0.001 |
|                                     | Yes             | 285 (75)  |  | 182 (66.4) |  | 103 (98.1)  |        |
| Surgery 90-day history              | No              | 340 (90)  |  | 239 (87.2) |  | 101 (96.2)  | 0.017  |
|                                     | Yes             | 39 (10)   |  | 35 (12.8)  |  | 4 (3.8)     |        |
| Type of infection                   |                 |           |  |            |  |             |        |
| Bacteremia                          | No              | 291 (77)  |  | 218 (79.6) |  | 73 (69.5)   | 0.053  |
|                                     | Yes             | 88 (23)   |  | 56 (20.4)  |  | 32 (30.5)   |        |
| Body Fluids                         | No              | 378 (100) |  | 273 (99.6) |  | 105 (100.0) | 1.000  |
|                                     | Yes             | 1 (0)     |  | 1 (0.4)    |  | 0 (0.0)     |        |
| Respiratory infections              | No              | 288 (76)  |  | 221 (80.7) |  | 67 (63.8)   | 0.001  |
|                                     | Yes             | 91 (24)   |  | 53 (19.3)  |  | 38 (36.2)   |        |
| Skin and soft tissue infections     | No              | 276 (73)  |  | 188 (68.6) |  | 88 (83.8)   | 0.004  |
|                                     | Yes             | 103 (27)  |  | 86 (31.4)  |  | 17 (16.2)   |        |
| Urinary tract infections            | No              | 283 (75)  |  | 196 (71.5) |  | 87 (82.9)   | 0.033  |
|                                     | Yes             | 96 (25)   |  | 78 (28.5)  |  | 18 (17.1)   |        |
| Gram-negative infections            | No              | 152 (40)  |  | 111 (40.5) |  | 41 (39.0)   | 0.886  |
|                                     | Yes             | 227 (60)  |  | 163 (59.5) |  | 64 (61.0)   |        |
| Gram-positive infections            | No              | 272 (72)  |  | 194 (70.8) |  | 78 (74.3)   | 0.585  |
|                                     | Yes             | 107 (28)  |  | 80 (29.2)  |  | 27 (25.7)   |        |
| Fungal infections                   | No              | 348 (92)  |  | 252 (92.0) |  | 96 (91.4)   | 1.000  |
|                                     | Yes             | 31 (8)    |  | 22 (8.0)   |  | 9 (8.6)     |        |
| SARS-CoV19 infections               | No              | 365 (96)  |  | 265 (96.7) |  | 100 (95.2)  | 0.705  |
|                                     | Yes             | 14 (4)    |  | 9 (3.3)    |  | 5 (4.8)     |        |
| CRE infections                      | No              | 255 (94)  |  | 253 (92.3) |  | 102 (97.1)  | 0.138  |
|                                     | Yes             | 24 (6)    |  | 21 (7.7)   |  | 3 (2.9)     |        |
| ESBL infections                     | No              | 329 (87)  |  | 239 (87.2) |  | 90 (85.7)   | 0.826  |
|                                     | Yes             | 50 (13)   |  | 35 (12.8)  |  | 15 (14.3)   |        |
| MDR infections                      | No              | 312 (82)  |  | 235 (85.8) |  | 77 (73.3)   | 0.007  |
|                                     | Yes             | 67 (18)   |  | 39 (14.2)  |  | 28 (26.7)   |        |
| MRSA infections                     | No              | 367 (97)  |  | 263 (96.0) |  | 104 (99.0)  | 0.232  |
|                                     | Yes             | 12 (3)    |  | 11 (4.0)   |  | 1 (1.0)     |        |
| Resistant phenotypes                | No              | 226 (60)  |  | 168 (61.3) |  | 58 (55.2)   | 0.336  |
|                                     | Yes             | 153 (40)  |  | 106 (38.7) |  | 47 (44.8)   |        |

|                                        |           |           |  |            |  |             |        |
|----------------------------------------|-----------|-----------|--|------------|--|-------------|--------|
| Place of Acquisition                   | Community | 212 (56)  |  | 180 (65.7) |  | 32 (30.5)   | <0.001 |
|                                        | Hospital  | 167 (44)  |  | 94 (34.3)  |  | 73 (69.5)   |        |
| 90-day recurrence of any infection     | No        | 243 (64)  |  | 143 (52.2) |  | 100 (95.2)  | <0.001 |
|                                        | Yes       | 136 (36)  |  | 131 (47.8) |  | 5 (4.8)     |        |
| Antimicrobial treatment                |           |           |  |            |  |             |        |
| Cephalosporins (90-day exposure)       | No        | 273 (82)  |  | 198 (72.3) |  | 76 (72.4)   | 1.000  |
|                                        | Yes       | 105 (28)  |  | 76 (27.7)  |  | 29 (27.6)   |        |
| Aminoglycosides (90-day exposure)      | No        | 354 (93)  |  | 253 (92.3) |  | 101 (96.2)  | 0.262  |
|                                        | Yes       | 25 (7)    |  | 21 (7.7)   |  | 4 (3.8)     |        |
| Tetracyclines (90-day exposure)        | No        | 360 (95)  |  | 259 (94.5) |  | 101 (96.2)  | 0.688  |
|                                        | Yes       | 19 (5)    |  | 15 (5.5)   |  | 4 (3.8)     |        |
| B-lactam/B-lactamase (90-day exposure) | No        | 321 (85)  |  | 242 (88.3) |  | 79 (75.2)   | 0.003  |
|                                        | Yes       | 58 (15)   |  | 32 (11.7)  |  | 26 (24.8)   |        |
| Macrolides (90-day exposure)           | No        | 345 (91)  |  | 258 (94.2) |  | 87 (82.9)   | 0.001  |
|                                        | Yes       | 34 (9)    |  | 16 (5.8)   |  | 18 (17.1)   |        |
| Glycopeptides (90-day exposure)        | No        | 346 (91)  |  | 245 (89.4) |  | 101 (96.2)  | 0.059  |
|                                        | Yes       | 33 (9)    |  | 29 (10.6)  |  | 4 (3.8)     |        |
| Nitroimidazole (90-day exposure)       | No        | 350 (92)  |  | 256 (93.4) |  | 94 (89.5)   | 0.287  |
|                                        | Yes       | 29 (8)    |  | 18 (6.6)   |  | 11 (10.5)   |        |
| Colistin (90-day exposure)             | No        | 378 (100) |  | 273 (99.6) |  | 105 (100.0) | 1.000  |
|                                        | Yes       | 1 (0)     |  | 1 (0.4)    |  | 0 (0.0)     |        |
| B-lactams (90-day exposure)            | No        | 310 (82)  |  | 232 (84.7) |  | 77 (73.3)   | 0.016  |
|                                        | Yes       | 70 (18)   |  | 42 (15.3)  |  | 28 (26.7)   |        |
| Glycylcycline (90-day exposure)        | No        | 376 (99)  |  | 271 (98.9) |  | 105 (100.0) | 0.668  |
|                                        | Yes       | 3 (1)     |  | 3 (1.1)    |  | 0 (0.0)     |        |
| Quinolones (90-day exposure)           | No        | 315 (83)  |  | 225 (82.1) |  | 90 (85.7)   | 0.494  |
|                                        | Yes       | 64 (17)   |  | 49 (17.9)  |  | 15 (14.3)   |        |
| Oxazolidinones (90-day exposure)       | No        | 377 (99)  |  | 272 (99.3) |  | 105 (100.0) | 0.932  |
|                                        | Yes       | 2 (1)     |  | 2 (0.7)    |  | 0 (0.0)     |        |
| 90-day exposure to any antibiotic      | No        | 221 (58)  |  | 166 (60.6) |  | 55 (52.4)   | 0.182  |
|                                        | Yes       | 158 (42)  |  | 108 (39.4) |  | 50 (47.6)   |        |
| History of infection                   |           |           |  |            |  |             |        |
| 90-days prior infection                | No        | 292 (77)  |  | 211 (77.0) |  | 81 (77.1)   | 1.000  |
|                                        | Yes       | 87 (23)   |  | 63 (23.0)  |  | 24 (22.9)   |        |
| Previous Gram-negative infection       | No        | 321 (87)  |  | 233 (85.0) |  | 98 (93.3)   | 0.045  |
|                                        | Yes       | 48 (13)   |  | 41 (15.0)  |  | 7 (6.7)     |        |
| Previous Gram-positive infection       | No        | 345 (91)  |  | 242 (88.3) |  | 103 (98.1)  | 0.005  |

|                                    |     |          |  |             |  |             |        |
|------------------------------------|-----|----------|--|-------------|--|-------------|--------|
|                                    | Yes | 34 (9)   |  | 32 (11.7)   |  | 2 (1.9)     |        |
| Previous fungal infections         | No  | 375 (99) |  | 270 (98.5)  |  | 105 (100.0) | 0.495  |
|                                    | Yes | 4 (1)    |  | 4 (1.5)     |  | 0 (0.0)     |        |
| Previous SARSCoV19 infection       | No  | 259 (95) |  | 271 (98.9)  |  | 88 (83.8)   | <0.001 |
|                                    | Yes | 20 (5)   |  | 3 (1.1)     |  | 17 (16.2)   |        |
| Polymicrobial Infections           | No  | 155 (41) |  | 137 (50.0)  |  | 18 (17.1)   | <0.001 |
|                                    | Yes | 224 (59) |  | 137 (50.0)  |  | 87 (82.9)   |        |
| Concurrent Gram-negative infection | No  | 210 (55) |  | 176 (64.2)  |  | 34 (32.4)   | <0.001 |
|                                    | Yes | 169 (45) |  | 98 (35.8)   |  | 71 (67.6)   |        |
| Concurrent Gram-positive infection | No  | 273 (72) |  | 206 (75.2)  |  | 67 (63.8)   | 0.038  |
|                                    | Yes | 106 (28) |  | 68 (24.8)   |  | 38 (36.2)   |        |
| Concurrent Fungal infection        | No  | 320 (84) |  | 249 (90.9)  |  | 71 (67.6)   | <0.001 |
|                                    | Yes | 59 (16)  |  | 25 (9.1)    |  | 34 (32.4)   |        |
| Concurrent SARSCoV19 infection     | No  | 372 (98) |  | 274 (100.0) |  | 98 (93.3)   | <0.001 |
|                                    | Yes | 7 (2)    |  | 0 (0.0)     |  | 7 (6.7)     |        |

**Table S2.** Predictors for infection-related crude all-cause in-hospital mortality.

|                                     |                 | Recovery<br>n (%) | Death<br>n (%) | Univariable OR (CI, P)     |   | OR (multivariable)          |
|-------------------------------------|-----------------|-------------------|----------------|----------------------------|---|-----------------------------|
| Sex                                 | Female          | 82 (71.9)         | 32 (28.1)      | -                          |   |                             |
|                                     | Male            | 192 (72.5)        | 73 (27.5)      | 0.97 (0.6-1.6, p=0.917)    |   |                             |
| Age on admission                    | Age Mean (SD)   | 53.2 (21.2)       | 72.9 (12.7)    | 1.1 (1.0-1.1, p<0.001)     | # | 1.13 (1.05-1.24, p=0.003)   |
|                                     | Age ≤ 60 Years  | 172 (90.5)        | 18 (9.5)       | -                          |   |                             |
|                                     | Age > 60 years  | 102 (54.0)        | 87 (46.0)      | 8.2 (4.7-14.7, p<0.001)    | # | 3.00 (0.20-45.77, p=0.426)  |
| Length of stay                      | LOS Mean (SD)   | 17.7 (19.2)       | 46. (48.7)     | 1.03 (1.02-1.04, p<0.001)  | # | 0.98 (0.96-1.02, p=0.321)   |
|                                     | LOS ≤ 14 days   | 168 (86.2)        | 27 (13.8)      | -                          |   |                             |
|                                     | LOS > 14 days   | 106 (57.6)        | 78 (42.4)      | 4.58 (2.81-7.66, p<0.001)  | # | 0.05 (0.01-0.35, p=0.004)   |
| Admission with infectious disease   | No              | 91 (85.8)         | 15 (14.2)      | -                          |   |                             |
|                                     | Yes             | 183 (67.0)        | 90 (33.0)      | 2.98 (1.68-5.63, p<0.001)  | # | 14.59 (2.0-156.98, p=0.015) |
| Admission to critical care area     | No              | 217 (82.8)        | 45 (17.2)      | -                          |   |                             |
|                                     | Yes             | 57 (48.7)         | 60 (51.3)      | 5.08 (3.14-8.29, p<0.001)  | # | 46.39 (5.1-716.25, p=0.002) |
| Diabetes                            | No              | 104 (83.2)        | 21 (16.8)      | -                          |   |                             |
|                                     | Yes             | 170 (66.9)        | 84 (33.1)      | 2.45 (1.45-4.27, p=0.001)  | # | 0.03 (0.00-0.48, p=0.077)   |
| Chronic renal failure               | No              | 133 (88.1)        | 18 (11.9)      | -                          |   |                             |
|                                     | Yes             | 141 (61.8)        | 87 (38.2)      | 4.56 (2.66-8.19, p<0.001)  | # | 0.12 (0.00-2.51, p=0.328)   |
| Active malignancy                   | No              | 267 (73.2)        | 98 (26.8)      | -                          |   |                             |
|                                     | Yes             | 7 (50.0)          | 7 (50.0)       | 2.72 (0.91-8.15, p=0.067)  | # | 0.11 (0.00-71.31, p=0.598)  |
| Immunosuppressed                    | No              | 259 (73.0)        | 96 (27.0)      | -                          |   |                             |
|                                     | Yes             | 15 (62.5)         | 9 (37.5)       | 1.62 (0.66-3.76, p=0.272)  |   |                             |
| Chronic Cardiac Diseases            | No              | 89 (91.8)         | 8 (8.2)        | -                          |   |                             |
|                                     | Yes             | 185 (65.6)        | 97 (34.4)      | 5.83 (2.87-13.5, p<0.001)  | # | 0.15 (0.00-6.99, p=0.423)   |
| Chronic Cardiac Diseases            | No              | 274 (72.5)        | 104 (27.5)     | -                          |   |                             |
|                                     | Yes             | 0 (0.0)           | 1 (100.0)      | *(p=0.978)                 |   |                             |
| Chronic Resp. Disease               | No              | 247 (79.9)        | 62 (20.1)      | -                          |   |                             |
|                                     | Yes             | 27 (38.6)         | 43 (61.4)      | 6.34 (3.66-11.2, p<0.001)  | # | 1.10 (0.00-29.04, p=0.966)  |
| Sickle Cell                         | No              | 256 (71.1)        | 104 (28.9)     | -                          |   |                             |
|                                     | Yes             | 18 (94.7)         | 1 (5.3)        | 0.14 (0.01-0.68, p=0.054)  | # | 0.01 (0.00-0.87, p=0.081)   |
| Other comorbidities                 | No              | 152 (76.0)        | 48 (24.0)      | -                          |   |                             |
|                                     | Yes             | 122 (68.2)        | 57 (31.8)      | 1.48 (0.94-2.33, p=0.089)  | # | 0.36 (0.00-7.60, p=0.626)   |
| Comorbid conditions                 | Mean (SD)       | 3.5 (1.4)         | 4.7 (1.1)      | 2.06 (1.67-2.58, p<0.001)  | # | 6.11 (0.36-2119.6, p=0.358) |
|                                     | No comorbidity  | 40 (97.6)         | 1 (2.4)        | -                          |   |                             |
|                                     | Any comorbidity | 234 (69.2)        | 104 (30.8)     | 17.8 (3.8-317.5, p=0.005)  | # | 111.3 (1.3-15131, p=0.045)  |
| Blood transfusion during admission  | No              | 146 (87.4)        | 21 (12.6)      | -                          |   |                             |
|                                     | Yes             | 128 (60.4)        | 84 (39.6)      | 4.56 (2.72-7.94, p<0.001)  | # | 0.95 (0.21-4.00, p=0.942)   |
| Invasive procedure during admission | No              | 92 (97.9)         | 2 (2.1)        | -                          |   |                             |
|                                     | Yes             | 182 (63.9)        | 103 (36.1)     | 26.03 (8-160.03, p<0.001)  | # | 392.6 (37.8-7562, p<0.001)  |
| Surgery 90-day history              | No              | 239 (70.3)        | 101 (29.7)     | -                          |   |                             |
|                                     | Yes             | 35 (89.7)         | 4 (10.3)       | 0.27 (0.08-0.70, p=0.016)  | # | 0.11 (0.01-0.73, p=0.031)   |
| Bacteremia                          | No              | 218 (74.9)        | 73 (25.1)      | -                          |   |                             |
|                                     | Yes             | 56 (63.6)         | 32 (36.4)      | 1.71 (1.02-2.83, p=0.040)  | # | * p=0.992                   |
| Body Fluids                         | No              | 273 (72.2)        | 105 (27.8)     | -                          |   |                             |
|                                     | Yes             | 1 (100.0)         | 0 (0.0)        | (p=0.981)                  |   |                             |
| Respiratory infections              | No              | 221 (76.7)        | 67 (23.3)      | -                          |   |                             |
|                                     | Yes             | 53 (58.2)         | 38 (41.8)      | 2.36 (1.43-3.89, p=0.001)  | # | *p=0.992                    |
| Skin and soft tissue infections     | No              | 188 (68.1)        | 88 (31.9)      | -                          |   |                             |
|                                     | Yes             | 86 (83.5)         | 17 (16.5)      | 0.42 (0.23-0.74, p=0.003)  | # | *p=0.993                    |
| Urinary tract infections            | No              | 196 (69.3)        | 87 (30.7)      | -                          |   |                             |
|                                     | Yes             | 78 (81.2)         | 18 (18.8)      | 0.52 (0.29, 0.92, P=0.025) | # | * p=0.993                   |
| Gram-negative infections            | No              | 111 (73.0)        | 41 (27.0)      | -                          |   |                             |
|                                     | Yes             | 163 (71.8)        | 64 (28.2)      | 1.06 (0.67-1.69, p=0.795)  |   |                             |
| Gram-positive infections            | No              | 194 (71.3)        | 78 (28.7)      | -                          |   |                             |
|                                     | Yes             | 80 (74.8)         | 27 (25.2)      | 0.84 (0.50-1.38, p=0.501)  |   |                             |
| Fungal infections                   | No              | 252 (72.4)        | 96 (27.6)      | -                          |   |                             |
|                                     | Yes             | 22 (71.0)         | 9 (29.0)       | 1.07 (0.45-2.34, p=0.863)  |   |                             |
| CRE infections                      | No              | 253 (71.3)        | 102 (28.7)     | -                          |   |                             |
|                                     | Yes             | 21 (87.5)         | 3 (12.5)       | 0.35 (0.08-1.06, p=0.099)  | # | 0.02 (0.00-0.39, p=0.013)   |
| ESBL infections                     | No              | 239 (72.6)        | 90 (27.4)      | -                          |   |                             |
|                                     | Yes             | 35 (70.0)         | 15 (30.0)      | 1.14 (0.58-2.15, p=0.697)  |   |                             |
| MDR infections                      | No              | 235 (75.3)        | 77 (24.7)      | -                          |   |                             |
|                                     | Yes             | 39 (58.2)         | 28 (41.8)      | 2.19 (1.26-3.79, p=0.005)  | # | 0.64 (0.13-3.11, p=0.575)   |
| MRSA infections                     | No              | 263 (71.7)        | 104 (28.3)     | -                          |   |                             |
|                                     | Yes             | 11 (91.7)         | 1 (8.3)        | 0.23 (0.01-1.20, p=0.162)  | # | 1.36 (0.04-19.46, p=0.840)  |
| Place of Acquisition                | Community       | 180 (84.9)        | 32 (15.1)      | -                          |   |                             |
|                                     | Hospital        | 94 (56.3)         | 73 (43.7)      | 4.37 (2.71-7.17, p<0.001)  | # | 5.22 (1.13-28.78, p=0.043)  |
|                                     | No              | 198 (72.3)        | 76 (27.7)      | -                          |   |                             |

|                                        |     |            |            |                           |   |                             |
|----------------------------------------|-----|------------|------------|---------------------------|---|-----------------------------|
| Cephalosporins (90-day exposure)       | Yes | 76 (72.4)  | 29 (27.6)  | 0.99 (0.60-1.63, p=0.982) |   |                             |
| Aminoglycosides (90-day exposure)      | No  | 253 (71.5) | 101 (28.5) | -                         |   |                             |
|                                        | Yes | 21 (84.0)  | 4 (16.0)   | 0.48 (0.14-1.29, p=0.185) | # | 2.17 (0.02-210.65, p=0.739) |
| Tetracyclines (90-day exposure)        | No  | 259 (71.9) | 101 (28.1) | -                         |   |                             |
|                                        | Yes | 15 (78.9)  | 4 (21.1)   | 0.68 (0.19-1.94, p=0.509) |   |                             |
| B-lactam/B-lactamase (90-day exposure) | No  | 242 (75.4) | 79 (24.6)  | -                         |   |                             |
|                                        | Yes | 32 (55.2)  | 26 (44.8)  | 2.49 (1.39-4.43, p=0.002) | # | 141.9 (10.7-2759, p<0.001)  |
| Macrolides (90-day exposure)           | No  | 258 (74.8) | 87 (25.2)  | -                         |   |                             |
|                                        | Yes | 16 (47.1)  | 18 (52.9)  | 3.34 (1.63-6.89, p=0.001) | # | 1.68 (0.09-31.01, p=0.724)  |
| Glycopeptides (90-day exposure)        | No  | 245 (70.8) | 101 (29.2) | -                         |   |                             |
|                                        | Yes | 29 (87.9)  | 4 (12.1)   | 0.33 (0.10-0.88, p=0.045) | # | 0.07 (0.00-2.54, p=0.171)   |
| Nitroimidazole (90-day exposure)       | No  | 256 (73.1) | 94 (26.9)  | -                         |   |                             |
|                                        | Yes | 18 (62.1)  | 11 (37.9)  | 1.66 (0.74-3.61, p=0.204) | # | 39.83 (1.2-1506.5, p=0.043) |
| Colistin (90-day exposure)             | No  | 273 (72.2) | 105 (27.8) | -                         |   |                             |
|                                        | Yes | 1 (100.0)  | 0 (0.0)    | 0.00 (*, p=0.981)         |   |                             |
| B-lactams (90-day exposure)            | No  | 232 (75.1) | 77 (24.9)  | -                         |   |                             |
|                                        | Yes | 42 (60.0)  | 28 (40.0)  | 2.01 (1.16-3.45, p=0.012) | # | 15.13 (1.57-172.3, p=0.021) |
| Quinolones (90-day exposure)           | No  | 225 (71.4) | 90 (28.6)  | -                         |   |                             |
|                                        | Yes | 49 (76.6)  | 15 (23.4)  | 0.77 (0.40-1.40, p=0.404) |   |                             |
| Oxazolidinones (90-day exposure)       | No  | 272 (72.1) | 105 (27.9) | -                         |   |                             |
|                                        | Yes | 2 (100.0)  | 0 (0.0)    | 0.00 (*, p=0.983)         |   |                             |
| 90-day exposure to any antibiotic      | No  | 166 (75.1) | 55 (24.9)  | -                         |   |                             |
|                                        | Yes | 108 (68.4) | 50 (31.6)  | 1.40 (0.89-2.20, p=0.148) | # | 0.28 (0.02-3.55, p=0.330)   |
| 90-days prior infection                | No  | 211 (72.3) | 81 (27.7)  | -                         |   |                             |
|                                        | Yes | 63 (72.4)  | 24 (27.6)  | 0.99 (0.57-1.68, p=0.978) |   |                             |
| Previous Gram-negative infection       | No  | 233 (70.4) | 98 (29.6)  | -                         |   |                             |
|                                        | Yes | 41 (85.4)  | 7 (14.6)   | 0.41 (0.16-0.88, p=0.034) | # | 0.72 (0.04-9.96, p=0.812)   |
| Previous Gram-positive infection       | No  | 242 (70.1) | 103 (29.9) | -                         |   |                             |
|                                        | Yes | 32 (94.1)  | 2 (5.9)    | 0.15 (0.02-0.50, p=0.009) | # | 0.01 (0.00-0.68, p=0.052)   |
| Previous fungal infection              | No  | 270 (72.0) | 105 (28.0) | -                         |   |                             |
|                                        | Yes | 4 (100.0)  | 0 (0.0)    | *p=0.984                  |   |                             |
| Previous SARSCoV19 infection           | No  | 271 (75.5) | 88 (24.5)  | -                         |   |                             |
|                                        | Yes | 3 (15.0)   | 17 (85.0)  | 17.45 (5.70-76, p<0.001)  | # | 1.42 (0.01-123.01, p=0.873) |
| Polymicrobial Infections               | No  | 137 (88.4) | 18 (11.6)  | -                         |   |                             |
|                                        | Yes | 137 (61.2) | 87 (38.8)  | 4.83 (2.82-8.69, p<0.001) | # | 1.91 (0.19-19.60, p=0.581)  |
| Concurrent Gram-negative infection     | No  | 176 (83.8) | 34 (16.2)  | -                         |   |                             |
|                                        | Yes | 98 (58.0)  | 71 (42.0)  | 3.75 (2.34-6.10, p<0.001) | # | 3.03 (0.51-21.84, p=0.241)  |
| Concurrent Gram-positive infection     | No  | 206 (75.5) | 67 (24.5)  | -                         |   |                             |
|                                        | Yes | 68 (64.2)  | 38 (35.8)  | 1.72 (1.06-2.78, p=0.028) | # | 0.71 (0.15-3.24, p=0.652)   |
| Concurrent Fungal infection            | No  | 249 (77.8) | 71 (22.2)  | -                         |   |                             |
|                                        | Yes | 25 (42.4)  | 34 (57.6)  | 4.77 (2.68-8.59, p<0.001) | # | 1.73 (0.25-12.42, p=0.575)  |
| Concurrent SARSCoV19 infection         | No  | 274 (73.7) | 98 (26.3)  | -                         |   |                             |
|                                        | Yes | 0 (0.0)    | 7 (100.0)  | *p=0.976                  |   |                             |

#: variables with  $p$ -values  $\leq 0.2$  are enrolled in multivariate analysis, \*: value is too high/too low to be detected by the software, 95% CI: Confidence intervals.

6

7

8

9

**Table S3.** Predictors for infection-related 14-day in-hospital mortality.

|                                     |                | No          | Yes         | Univariable OR (CI, P)     |   | Multivariable OR (CI, P)      |
|-------------------------------------|----------------|-------------|-------------|----------------------------|---|-------------------------------|
| Sex                                 | F              | 111 (97.4)  | 3 (2.6)     | -                          |   |                               |
|                                     | M              | 241 (90.9)  | 24 (9.1)    | 3.68 (1.25-15.73, p=0.036) | # | 5.01 (0.70-65.98, p=0.154)    |
| Age on admission.                   | Age Mean (SD)  | 57.5 (21.1) | 73.4 (16.0) | 1.05 (1.02-1.07, p<0.001)  | # | 1.06 (0.99-1.14, p=0.116)     |
|                                     | Age ≤ 60 Years | 185 (97.4)  | 5 (2.6)     | -                          |   |                               |
|                                     | Age > 60 years | 167 (88.4)  | 22 (11.6)   | 4.87 (1.95-14.81, p=0.002) | # | 1.06 (0.08-15.47, p=0.967)    |
| Length of stay                      | Mean (SD)      | 27.2 (33.7) | 5.3 (3.7)   | 0.85 (0.77-0.92, p<0.001)  | # | 0.71 (0.58-0.83, p<0.001)     |
|                                     | LOS ≤ 14 days  | 168 (86.2)  | 27 (13.8)   | -                          |   |                               |
|                                     | LOS > 14 days  | 184 (100.0) | 0 (0.0)     | * (p=0.989)                |   |                               |
| Admission with infectious disease   | No             | 100 (94.3)  | 6 (5.7)     | -                          |   |                               |
|                                     | Yes            | 252 (92.3)  | 21 (7.7)    | 1.39 (0.58-3.88, p=0.492)  |   |                               |
| Admission to critical care area     | No             | 246 (93.9)  | 16 (6.1)    | -                          |   |                               |
|                                     | Yes            | 106 (90.6)  | 11 (9.4)    | 1.60 (0.70-3.52, p=0.253)  |   |                               |
| Admission to medical wards          | No             | 220 (94.4)  | 13 (5.6)    | -                          |   |                               |
|                                     | Yes            | 132 (90.4)  | 14 (9.6)    | 1.79 (0.81-3.98, p=0.144)  |   |                               |
| Diabetes                            | No             | 115 (92.0)  | 10 (8.0)    | -                          |   |                               |
|                                     | Yes            | 237 (93.3)  | 17 (6.7)    | 0.82 (0.37-1.92, p=0.642)  |   |                               |
| Chronic renal failure               | No             | 144 (95.4)  | 7 (4.6)     | -                          |   |                               |
|                                     | Yes            | 208 (91.2)  | 20 (8.8)    | 1.98 (0.85-5.15, p=0.132)  | # | 0.60 (0.11-3.20, p=0.550)     |
| Active malignancy                   | No             | 339 (92.9)  | 26 (7.1)    | -                          |   |                               |
|                                     | Yes            | 13 (92.9)   | 1 (7.1)     | 1.00 (0.05-5.35, p=0.998)  |   |                               |
| Immunosuppressed                    | No             | 330 (93.0)  | 25 (7.0)    | -                          |   |                               |
|                                     | Yes            | 22 (91.7)   | 2 (8.3)     | 1.20 (0.19-4.40, p=0.812)  |   |                               |
| Chronic Cardiac Diseases            | No             | 92 (94.8)   | 5 (5.2)     | -                          |   |                               |
|                                     | Yes            | 260 (92.2)  | 22 (7.8)    | 1.56 (0.62-4.75, p=0.385)  |   |                               |
| HIV follow up                       | No             | 352 (93.1)  | 26 (6.9)    | -                          |   |                               |
|                                     | Yes            | 0 (0.0)     | 1 (100.0)   | * (p=0.984)                |   |                               |
| Chronic Resp. Disease               | No             | 287 (92.9)  | 22 (7.1)    | -                          |   |                               |
|                                     | Yes            | 65 (92.9)   | 5 (7.1)     | 1.00 (0.33-2.56, p=0.995)  |   |                               |
| Sickle Cell                         | No             | 333 (92.5)  | 27 (7.5)    | -                          |   |                               |
|                                     | Yes            | 19 (100.0)  | 0 (0.0)     | * (p=0.987)                |   |                               |
| Other comorbidities                 | No             | 186 (93.0)  | 14 (7.0)    | -                          |   |                               |
|                                     | Yes            | 166 (92.7)  | 13 (7.3)    | 1.04 (0.47-2.29, p=0.921)  |   |                               |
| Comorbid conditions                 | Mean (SD)      | 3.8 (1.5)   | 4.0 (0.9)   | 1.10 (0.84-1.46, p=0.511)  |   |                               |
|                                     | No comorbid    | 40 (97.6)   | 1 (2.4)     | -                          |   |                               |
|                                     | Any comorbid   | 312 (92.3)  | 26 (7.7)    | 3.33 (0.68-60.30, p=0.244) |   |                               |
| Blood transfusion during admission  | No             | 151 (90.4)  | 16 (9.6)    | -                          |   |                               |
|                                     | Yes            | 201 (94.8)  | 11 (5.2)    | 0.52 (0.23-1.14, p=0.104)  | # | 1.73 (0.43-7.20, p=0.441)     |
| Invasive procedure during admission | No             | 92 (97.9)   | 2 (2.1)     | -                          |   |                               |
|                                     | Yes            | 260 (91.2)  | 25 (8.8)    | 4.42 (1.28-27.83, p=0.046) | # | 100.8 (13.88-1455.8, p<0.001) |
| Surgery 90-day history              | No             | 313 (92.1)  | 27 (7.9)    | -                          |   |                               |
|                                     | Yes            | 39 (100.0)  | 0 (0.0)     | * (p=0.988)                |   |                               |
| Bacteremia                          | No             | 277 (95.2)  | 14 (4.8)    | -                          |   |                               |
|                                     | Yes            | 75 (85.2)   | 13 (14.8)   | 3.43 (1.53-7.65, p=0.002)  | # | 2.06 (0.40-11.46, p=0.389)    |
| Body Fluids                         | No             | 351 (92.9)  | 27 (7.1)    | -                          |   |                               |
|                                     | Yes            | 1 (100.0)   | 0 (0.0)     | * (p=0.989)                |   |                               |
| Respiratory infections              | No             | 266 (92.4)  | 22 (7.6)    | -                          |   |                               |
|                                     | Yes            | 86 (94.5)   | 5 (5.5)     | 0.70 (0.23-1.78, p=0.490)  |   |                               |
| Skin and soft tissue infections     | No             | 253 (91.7)  | 23 (8.3)    | -                          |   |                               |
|                                     | Yes            | 99 (96.1)   | 4 (3.9)     | 0.44 (0.13-1.19, p=0.144)  | # | 0.40 (0.06-2.50, p=0.333)     |
| Gram-negative infections            | No             | 135 (88.8)  | 17 (11.2)   | -                          |   |                               |
|                                     | Yes            | 217 (95.6)  | 10 (4.4)    | 0.37 (0.16-0.81, p=0.015)  | # | 0.24 (0.03-1.99, p=0.172)     |
| Gram-positive infections            | No             | 258 (94.9)  | 14 (5.1)    | -                          |   |                               |
|                                     | Yes            | 94 (87.9)   | 13 (12.1)   | 2.55 (1.14-5.65, p=0.020)  | # | 1.00 (0.11-9.98, p=0.998)     |
| Fungal infections                   | No             | 322 (92.5)  | 26 (7.5)    | -                          |   |                               |
|                                     | Yes            | 30 (96.8)   | 1 (3.2)     | 0.41 (0.02-2.05, p=0.393)  |   |                               |
| CRE infections                      | No             | 329 (92.7)  | 26 (7.3)    | -                          |   |                               |
|                                     | Yes            | 23 (95.8)   | 1 (4.2)     | 0.55 (0.03-2.78, p=0.566)  |   |                               |
| ESBL infections                     | No             | 304 (92.4)  | 25 (7.6)    | -                          |   |                               |
|                                     | Yes            | 48 (96.0)   | 2 (4.0)     | 0.51 (0.08-1.78, p=0.365)  |   |                               |
| MDR infections                      | No             | 291 (93.3)  | 21 (6.7)    | -                          |   |                               |
|                                     | Yes            | 61 (91.0)   | 6 (9.0)     | 1.36 (0.48-3.33, p=0.522)  |   |                               |
| MRSA infections                     | No             | 341 (92.9)  | 26 (7.1)    | -                          |   |                               |
|                                     | Yes            | 11 (91.7)   | 1 (8.3)     | 1.19 (0.06-6.50, p=0.869)  |   |                               |
| Place of Acquisition                | Community      | 190 (89.6)  | 22 (10.4)   | -                          |   |                               |
|                                     | Hospital       | 162 (97.0)  | 5 (3.0)     | 0.27 (0.09-0.67, p=0.009)  | # | 4.80 (0.57-50.13, p=0.162)    |
|                                     | No             | 254 (92.7)  | 20 (7.3)    | -                          |   |                               |

|                                        |     |            |          |                            |   |                               |
|----------------------------------------|-----|------------|----------|----------------------------|---|-------------------------------|
| Cephalosporins (90-day exposure)       | Yes | 98 (93.3)  | 7 (6.7)  | 0.91 (0.35-2.12, p=0.830)  |   |                               |
| Aminoglycosides (90-day exposure)      | No  | 331 (93.5) | 23 (6.5) | -                          |   |                               |
|                                        | Yes | 21 (84.0)  | 4 (16.0) | 2.74 (0.75-7.96, p=0.086)  | # | 189.1 (2.47-18342.5, p=0.020) |
| Tetracyclines (90-day exposure)        | No  | 336 (93.3) | 24 (6.7) | -                          |   |                               |
|                                        | Yes | 16 (84.2)  | 3 (15.8) | 2.62 (0.58-8.58, p=0.146)  | # | 0.35 (0.01-14.33, p=0.559)    |
| B-lactam/B-lactamase (90-day exposure) | No  | 295 (91.9) | 26 (8.1) | -                          |   |                               |
|                                        | Yes | 57 (98.3)  | 1 (1.7)  | 0.20 (0.01-0.97, p=0.117)  | # | 0.01 (0.00-0.23, p=0.013)     |
| Macrolides (90-day exposure)           | No  | 318 (92.2) | 27 (7.8) | -                          |   |                               |
|                                        | Yes | 34 (100.0) | 0 (0.0)  | * (p=0.989)                |   |                               |
| Glycopeptides (90-day exposure)        | No  | 323 (93.4) | 23 (6.6) | -                          |   |                               |
|                                        | Yes | 29 (87.9)  | 4 (12.1) | 1.94 (0.54-5.47, p=0.251)  |   |                               |
| Nitroimidazole (90-day exposure)       | No  | 326 (93.1) | 24 (6.9) | -                          |   |                               |
|                                        | Yes | 26 (89.7)  | 3 (10.3) | 1.57 (0.36-4.88, p=0.486)  |   |                               |
| Colistin (90-day exposure)             | No  | 351 (92.9) | 27 (7.1) | -                          |   |                               |
|                                        | Yes | 1 (100.0)  | 0 (0.0)  | * (p=0.989)                |   |                               |
| B-lactams (90-day exposure)            | No  | 282 (91.3) | 27 (8.7) | -                          |   |                               |
|                                        | Yes | 70 (100.0) | 0 (0.0)  | * (p=0.989)                |   |                               |
| Glycylcycline (90-day exposure)        | No  | 349 (92.8) | 27 (7.2) | -                          |   |                               |
|                                        | Yes | 3 (100.0)  | 0 (0.0)  | * (p=0.988)                |   |                               |
| Oxazolidinones (90-day exposure)       | No  | 350 (92.8) | 27 (7.2) | -                          |   |                               |
|                                        | Yes | 2 (100.0)  | 0 (0.0)  | * (p=0.990)                |   |                               |
| 90-day exposure to any antibiotic      | No  | 201 (91.0) | 20 (9.0) | -                          |   |                               |
|                                        | Yes | 151 (95.6) | 7 (4.4)  | 0.47 (0.18-1.08, p=0.091)  | # | 0.28 (0.04-1.46, p=0.157)     |
| 90-days prior infection                | No  | 268 (91.8) | 24 (8.2) | -                          |   |                               |
|                                        | Yes | 84 (96.6)  | 3 (3.4)  | 0.40 (0.09-1.18, p=0.141)  | # | 0.21 (0.02-1.70, p=0.179)     |
| Previous Gram-negative infection       | No  | 307 (92.7) | 24 (7.3) | -                          |   |                               |
|                                        | Yes | 45 (93.8)  | 3 (6.2)  | 0.85 (0.20-2.57, p=0.801)  |   |                               |
| Previous Gram-positive infection       | No  | 320 (92.8) | 25 (7.2) | -                          |   |                               |
|                                        | Yes | 32 (94.1)  | 2 (5.9)  | 0.80 (0.13-2.86, p=0.768)  |   |                               |
| Previous fungal infection              | No  | 348 (92.8) | 27 (7.2) | -                          |   |                               |
|                                        | Yes | 4 (100.0)  | 0 (0.0)  | * (p=0.991)                |   |                               |
| Previous SARSCoV19 infection           | No  | 332 (92.5) | 27 (7.5) | -                          |   |                               |
|                                        | Yes | 20 (100.0) | 0 (0.0)  | * (p=0.986)                |   |                               |
| Polymicrobial Infections               | No  | 140 (90.3) | 15 (9.7) | -                          |   |                               |
|                                        | Yes | 212 (94.6) | 12 (5.4) | 0.53 (0.24-1.16, p=0.113)  | # | 2.68 (0.24-24.41, p=0.386)    |
| Concurrent Gram-negative infection     | No  | 191 (91.0) | 19 (9.0) | -                          |   |                               |
|                                        | Yes | 161 (95.3) | 8 (4.7)  | 0.50 (0.20-1.13, p=0.110)  | # | 0.36 (0.04-4.35, p=0.394)     |
| Concurrent Gram-positive infection     | No  | 252 (92.3) | 21 (7.7) | -                          |   |                               |
|                                        | Yes | 100 (94.3) | 6 (5.7)  | 0.72 (0.26-1.74, p=0.492)  |   |                               |
| Concurrent Fungal infection            | No  | 293 (91.6) | 27 (8.4) | -                          |   |                               |
|                                        | Yes | 59 (100.0) | 0 (0.0)  | * (p=0.985)                |   |                               |
| Concurrent SARSCoV19 infection         | No  | 348 (93.5) | 24 (6.5) | -                          |   |                               |
|                                        | Yes | 4 (57.1)   | 3 (42.9) | 10.87 (2.05-52.1, p=0.003) | # | 4.92 (0.04-1209.39, p=0.612)  |

#: variables with  $p$ -values  $\leq 0.2$  are enrolled in multivariate analysis, , 95% CI: Confidence intervals.

11

12



**Table S4.** Predictors for infection-related 28-day mortality.

|                                     |              | No          | Yes         | Univariable OR (CI, P)     |   | Multivariable OR (CI, P)    |
|-------------------------------------|--------------|-------------|-------------|----------------------------|---|-----------------------------|
| Sex                                 | F            | 114 (100.0) | 0 (0.0)     | -                          |   | -                           |
|                                     | M            | 235 (88.7)  | 30 (11.3)   | * (p=0.986)                |   |                             |
| Age on admission Years.             | Mean (SD)    | 57.6 (21.3) | 70.8 (14.8) | 1.04 (1.01-1.06, p=0.002)  | # | 0.96 (0.89-1.03, p=0.257)   |
|                                     | ≤ 60 Years   | 185 (97.4)  | 5 (2.6)     | -                          |   |                             |
|                                     | > 60 years   | 164 (86.8)  | 25 (13.2)   | 5.64 (2.29-17.01, p=0.001) | # | 66.8 (3.58-2143.2, p=0.009) |
| Length of stay.                     | Mean (SD)    | 26.1 (34.3) | 20.7 (4.2)  | 0.99 (0.98-1.01, p=0.396)  |   |                             |
|                                     | ≤ 14 days    | 195 (100.0) | 0 (0.0)     | -                          |   |                             |
|                                     | > 14 days    | 154 (83.7)  | 30 (16.3)   | * (p=0.988)                |   |                             |
| Admission with infectious disease   | No           | 102 (96.2)  | 4 (3.8)     | -                          |   |                             |
|                                     | Yes          | 247 (90.5)  | 26 (9.5)    | 2.68 (1.01-9.27, p=0.073)  | # | 4.02 (0.97-21.13, p=0.072)  |
| Admission to critical care area     | No           | 241 (92.0)  | 21 (8.0)    | -                          |   |                             |
|                                     | Yes          | 108 (92.3)  | 9 (7.7)     | 0.96 (0.40-2.10, p=0.914)  |   |                             |
| Admission to medical wards          | No           | 224 (96.1)  | 9 (3.9)     | -                          |   |                             |
|                                     | Yes          | 125 (85.6)  | 21 (14.4)   | 4.18 (1.91-9.87, p=0.001)  |   |                             |
| Diabetes                            | No           | 118 (94.4)  | 7 (5.6)     | -                          |   |                             |
|                                     | Yes          | 231 (90.9)  | 23 (9.1)    | 1.68 (0.73-4.33, p=0.246)  |   |                             |
| Chronic renal failure               | No           | 144 (95.4)  | 7 (4.6)     | -                          |   |                             |
|                                     | Yes          | 205 (89.9)  | 23 (10.1)   | 2.31 (1.01-5.95, p=0.060)  | # | 0.02 (0.00-0.40, p=0.015)   |
| Active malignancy                   | No           | 341 (93.4)  | 24 (6.6)    | -                          |   |                             |
|                                     | Yes          | 8 (57.1)    | 6 (42.9)    | 10.66 (3.28-33.2, p<0.001) | # | * (p=0.830)                 |
| Immunosuppressed                    | No           | 331 (93.2)  | 24 (6.8)    | -                          |   |                             |
|                                     | Yes          | 18 (75.0)   | 6 (25.0)    | 4.60 (1.55-12.15, p=0.003) | # | 0.00 (0.00-1.13, p=0.843)   |
| Chronic Cardiac Diseases            | No           | 94 (96.9)   | 3 (3.1)     | -                          |   |                             |
|                                     | Yes          | 255 (90.4)  | 27 (9.6)    | 3.32 (1.14-14.12, p=0.053) | # | 4.30 (0.39-67.64, p=0.260)  |
| HIV follow up                       | No           | 348 (92.1)  | 30 (7.9)    | -                          |   |                             |
|                                     | Yes          | 1 (100.0)   | 0 (0.0)     | * (p=0.989)                |   |                             |
| Chronic Resp. Disease               | No           | 281 (90.9)  | 28 (9.1)    | -                          |   |                             |
|                                     | Yes          | 68 (97.1)   | 2 (2.9)     | 0.30 (0.05-1.02, p=0.101)  | # | 0.00 (0.00-0.07, p=0.001)   |
| Sickle Cell                         | No           | 331 (91.9)  | 29 (8.1)    | -                          |   |                             |
|                                     | Yes          | 18 (94.7)   | 1 (5.3)     | 0.63 (0.03-3.25, p=0.663)  |   |                             |
| Other comorbidities                 | No           | 194 (97.0)  | 6 (3.0)     | -                          |   |                             |
|                                     | Yes          | 155 (86.6)  | 24 (13.4)   | 5.01 (2.12-13.79, p=0.001) | # | 0.13 (0.01-1.51, p=0.117)   |
| Comorbid conditions                 | Mean (SD)    | 3.7 (1.4)   | 4.8 (1.6)   | 1.81 (1.33-2.55, p<0.001)  | # | 3.16 (0.77-15.18, p=0.123)  |
|                                     | No           | 41 (100.0)  | 0 (0.0)     | -                          |   |                             |
|                                     | Any comorbid | 308 (91.1)  | 30 (8.9)    | * (p=0.987)                |   |                             |
| Blood transfusion                   | No           | 162 (97.0)  | 5 (3.0)     | -                          |   |                             |
|                                     | Yes          | 187 (88.2)  | 25 (11.8)   | 4.33 (1.75-13.06, p=0.003) | # | 13.70 (2.85-91.25, p=0.003) |
| Invasive procedure during admission | No           | 94 (100.0)  | 0 (0.0)     | -                          |   |                             |
|                                     | Yes          | 255 (89.5)  | 30 (10.5)   | * (p=0.987)                |   |                             |
| Surgery 90-day history              | No           | 314 (92.4)  | 26 (7.6)    | -                          |   |                             |
|                                     | Yes          | 35 (89.7)   | 4 (10.3)    | 1.38 (0.39-3.80, p=0.569)  |   |                             |
| Bacteremia                          | No           | 270 (92.8)  | 21 (7.2)    | -                          |   |                             |
|                                     | Yes          | 79 (89.8)   | 9 (10.2)    | 1.46 (0.62-3.24, p=0.362)  |   |                             |
| Body Fluids                         | No           | 348 (92.1)  | 30 (7.9)    | -                          |   |                             |
|                                     | Yes          | 1 (100.0)   | 0 (0.0)     | * (p=0.989)                |   |                             |
| Respiratory infections              | No           | 270 (93.8)  | 18 (6.2)    | -                          |   |                             |
|                                     | Yes          | 79 (86.8)   | 12 (13.2)   | 2.28 (1.03-4.89, p=0.037)  | # | 1.28 (0.38-4.35, p=0.689)   |
| Skin and soft tissue infections     | No           | 247 (89.5)  | 29 (10.5)   | -                          |   |                             |
|                                     | Yes          | 102 (99.0)  | 1 (1.0)     | 0.08 (0.00-0.40, p=0.015)  | # | 0.14 (0.00-1.35, p=0.148)   |
| Gram-negative infections            | No           | 140 (92.1)  | 12 (7.9)    | -                          |   |                             |
|                                     | Yes          | 209 (92.1)  | 18 (7.9)    | 1.00 (0.47-2.20, p=0.990)  |   |                             |
| Gram-positive infections            | No           | 248 (91.2)  | 24 (8.8)    | -                          |   |                             |
|                                     | Yes          | 101 (94.4)  | 6 (5.6)     | 0.61 (0.22-1.46, p=0.301)  |   |                             |
| Fungal infections                   | No           | 323 (92.8)  | 25 (7.2)    | -                          |   |                             |
|                                     | Yes          | 26 (83.9)   | 5 (16.1)    | 2.48 (0.79-6.58, p=0.086)  | # | 4.35 (0.54-34.25, p=0.157)  |
| CRE infections                      | No           | 327 (92.1)  | 28 (7.9)    | -                          |   |                             |
|                                     | Yes          | 22 (91.7)   | 2 (8.3)     | 1.06 (0.16-3.87, p=0.938)  |   |                             |
| ESBL infections                     | No           | 300 (91.2)  | 29 (8.8)    | -                          |   |                             |
|                                     | Yes          | 49 (98.0)   | 1 (2.0)     | 0.21 (0.01-1.02, p=0.131)  | # | 0.38 (0.02-3.09, p=0.431)   |
| MDR infections                      | No           | 289 (92.6)  | 23 (7.4)    | -                          |   |                             |
|                                     | Yes          | 60 (89.6)   | 7 (10.4)    | 1.47 (0.56-3.41, p=0.400)  |   |                             |
| MRSA infections                     | No           | 337 (91.8)  | 30 (8.2)    | -                          |   |                             |
|                                     | Yes          | 12 (100.0)  | 0 (0.0)     | * (p=0.989)                |   |                             |
| Place of Acquisition                | Community    | 204 (96.2)  | 8 (3.8)     | -                          |   |                             |
|                                     | Hospital     | 145 (86.8)  | 22 (13.2)   | 3.87 (1.74-9.48, p=0.002)  | # | 6.62 (1.44-37.62, p=0.021)  |
|                                     | No           | 257 (93.8)  | 17 (6.2)    | -                          |   |                             |

|                                        |     |            |           |                            |   |                             |
|----------------------------------------|-----|------------|-----------|----------------------------|---|-----------------------------|
| Cephalosporins (90-day exposure)       | Yes | 92 (87.6)  | 13 (12.4) | 2.14 (0.98-4.55, p=0.050)  | # | 13.21 (2.3-102.04, p=0.007) |
| Aminoglycosides (90-day exposure)      | No  | 324 (91.5) | 30 (8.5)  | -                          |   |                             |
|                                        | Yes | 25 (100.0) | 0 (0.0)   | * (p=0.985)                |   |                             |
| Tetracyclines (90-day exposure)        | No  | 330 (91.7) | 30 (8.3)  | -                          |   |                             |
|                                        | Yes | 19 (100.0) | 0 (0.0)   | * (p=0.987)                |   |                             |
| B-lactam/B-lactamase (90-day exposure) | No  | 300 (93.5) | 21 (6.5)  | -                          |   |                             |
|                                        | Yes | 49 (84.5)  | 9 (15.5)  | 2.62 (1.09-5.91, p=0.024)  | # | 22.1 (4.66-137.65, p<0.001) |
| Glycopeptides (90-day exposure)        | No  | 316 (91.3) | 30 (8.7)  | -                          |   |                             |
|                                        | Yes | 33 (100.0) | 0 (0.0)   | * (p=0.989)                |   |                             |
| Nitroimidazole (90-day exposure)       | No  | 320 (91.4) | 30 (8.6)  | -                          |   |                             |
|                                        | Yes | 29 (100.0) | 0 (0.0)   | * (p=0.989)                |   |                             |
| Colistin (90-day exposure)             | No  | 348 (92.1) | 30 (7.9)  | -                          |   |                             |
|                                        | Yes | 1 (100.0)  | 0 (0.0)   | * (p=0.989)                |   |                             |
| Glycylcycline (90-day exposure)        | No  | 346 (92.0) | 30 (8.0)  | -                          |   |                             |
|                                        | Yes | 3 (100.0)  | 0 (0.0)   | * (p=0.988)                |   |                             |
| Oxazolidinones (90-day exposure)       | No  | 347 (92.0) | 30 (8.0)  | -                          |   |                             |
|                                        | Yes | 2 (100.0)  | 0 (0.0)   | * (p=0.990)                |   |                             |
| Previous Gram-negative infection       | No  | 305 (92.1) | 26 (7.9)  | -                          |   |                             |
|                                        | Yes | 44 (91.7)  | 4 (8.3)   | 1.07 (0.30-2.90, p=0.909)  |   |                             |
| Previous fungal infection              | No  | 345 (92.0) | 30 (8.0)  | -                          |   |                             |
|                                        | Yes | 4 (100.0)  | 0 (0.0)   | * (p=0.991)                |   |                             |
| Polymicrobial Infections               | No  | 153 (98.7) | 2 (1.3)   | -                          |   |                             |
|                                        | Yes | 196 (87.5) | 28 (12.5) | 10.93 (3.2-68.35, p=0.001) | # | 31.8 (1.97-934.33, p=0.024) |
| Concurrent Gram-negative infection     | No  | 205 (97.6) | 5 (2.4)   | -                          |   |                             |
|                                        | Yes | 144 (85.2) | 25 (14.8) | 7.12 (2.88-21.48, p<0.001) | # | 4.73 (0.97-34.53, p=0.081)  |
| Concurrent Gram-positive infection     | No  | 252 (92.3) | 21 (7.7)  | -                          |   |                             |
|                                        | Yes | 97 (91.5)  | 9 (8.5)   | 1.11 (0.47-2.45, p=0.796)  |   |                             |

#: variables with  $p$ -values  $\leq 0.2$  are enrolled in multivariate analysis, , 95% CI: Confidence intervals.
